# Supplementary material
Source: MDPI journal article supplement (https://www.mdpi.com/2571-6255/6/6/216)
Supplement: s1 [file s1]

**Table S1.** Anova summaries of classification and linear regression methods predicting total fuel load and fuel load by component.

| Component         | Predictor               | SS      | DF  | <i>F</i> | <i>p</i> |
|-------------------|-------------------------|---------|-----|----------|----------|
| Classification    |                         |         |     |          |          |
| 1-hr woody        | Cover type              | 6.34    | 4   | 18.13    | < 0.01   |
|                   | Residuals               | 37.17   | 425 |          |          |
| 10-hr woody       | Cover type              | 16.34   | 4   | 4.19     | < 0.01   |
|                   | Residuals               | 414.21  | 425 |          |          |
| 100-hr woody      | Cover type              | 27.81   | 4   | 4.16     | < 0.01   |
|                   | Residuals               | 709.66  | 425 |          |          |
| Litter            | Cover type              | 1.13    | 4   | 8.91     | < 0.01   |
|                   | Residuals               | 13.49   | 425 |          |          |
| Duff              | Cover type              | 375.86  | 4   | 43.39    | < 0.01   |
|                   | Residuals               | 920.48  | 425 |          |          |
| Total             | Cover type              | 862.86  | 4   | 33.31    | < 0.01   |
|                   | Residuals               | 2752.15 | 425 |          |          |
| Linear regression |                         |         |     |          |          |
| 1-hr woody        | Basal area              | 1.64    | 1   | 20.18    | < 0.01   |
|                   | Cover type              | 2.84    | 4   | 8.75     | < 0.01   |
|                   | Distance to tree        | 0.41    | 1   | 5.12     | 0.02     |
|                   | Distance to large tree  | 0.17    | 1   | 2.07     | 0.15     |
|                   | Slope                   | 0.38    | 1   | 4.71     | 0.03     |
|                   | Residuals               | 34.13   | 421 |          |          |
| 10-hr woody       | Cover type              | 4.6     | 4   | 1.22     | 0.3      |
|                   | TPH                     | 2.9     | 1   | 3.11     | 0.08     |
|                   | Distance to tree        | 1.4     | 1   | 1.47     | 0.23     |
|                   | Aspect                  | 2.6     | 1   | 2.76     | 0.1      |
|                   | Flow direction          | 11.2    | 1   | 11.86    | < 0.01   |
|                   | Topographic wetness     | 4.3     | 1   | 4.58     | 0.03     |
|                   | Residuals               | 396.8   | 420 |          |          |
| 100-hr woody      | Cover type              | 16.5    | 4   | 2.56     | 0.04     |
|                   | Flow direction          | 10.3    | 1   | 6.41     | 0.01     |
|                   | Topographic wetness     | 3.5     | 1   | 2.18     | 0.14     |
|                   | Curvature               | 21.7    | 1   | 13.48    | < 0.01   |
|                   | Residuals               | 680.8   | 422 |          |          |
| Litter            | Basal area              | 0.26    | 1   | 8.48     | < 0.01   |
|                   | Cover type              | 0.84    | 4   | 6.87     | < 0.01   |
|                   | Large trees per hectare | 0.08    | 1   | 2.72     | 0.1      |
|                   | Slope                   | 0.27    | 1   | 9.02     | < 0.01   |
|                   | Aspect                  | 0.18    | 1   | 6.05     | 0.01     |
|                   | Topographic wetness     | 0.11    | 1   | 3.71     | 0.05     |
|                   | Surface relief ratio    | 0.08    | 1   | 2.5      | 0.11     |
|                   | Residuals               | 12.74   | 419 |          |          |
| Duff              | Basal area              | 47.1    | 1   | 24.28    | < 0.01   |
|                   | Cover type              | 36.8    | 4   | 4.74     | < 0.01   |
|                   | TPH                     | 21.1    | 1   | 10.88    | < 0.01   |
|                   | Large tree TPH          | 25.8    | 1   | 13.33    | < 0.01   |

|       |                        |        |     |       |        |
|-------|------------------------|--------|-----|-------|--------|
|       | Distance to large tree | 25.5   | 1   | 13.14 | < 0.01 |
|       | Slope                  | 10.5   | 1   | 5.43  | 0.02   |
|       | Aspect                 | 8.1    | 1   | 4.19  | 0.04   |
|       | Curvature              | 7      | 1   | 3.6   | 0.06   |
|       | Surface relief ratio   | 7      | 1   | 3.63  | 0.06   |
|       | Residuals              | 808.7  | 417 |       |        |
| Total | Basal area             | 44.9   | 1   | 7.42  | 0.01   |
|       | Cover type             | 329.7  | 4   | 13.61 | < 0.01 |
|       | Distance to tree       | 58.4   | 1   | 9.65  | < 0.01 |
|       | Aspect                 | 11.2   | 1   | 1.85  | 0.17   |
|       | Flow direction         | 32.5   | 1   | 5.37  | 0.02   |
|       | Residuals              | 2548.6 | 421 |       |        |

**Table S2.** Regression tables of classification and linear regression methods predicting total fuel load and fuel load by component. PIEN is the dummy-coded cover type. Were PIEN = Engelmann spruce, PIPO = ponderosa pine, PIPU = blue spruce, POTR = quaking aspen, and PSME = Douglas-fir.

| Component      | Predictor         | $\beta$ | SE   | <i>t</i> | <i>p</i> |
|----------------|-------------------|---------|------|----------|----------|
| Classification |                   |         |      |          |          |
| 1-hr woody     | (Intercept)       | 0.40    | 0.03 | 15.70    | < 0.01   |
|                | Cover type [PIPO] | -0.22   | 0.04 | -6.25    | < 0.01   |
|                | Cover type [PIPU] | 0.03    | 0.06 | 0.49     | < 0.01   |
|                | Cover type [POTR] | -0.26   | 0.04 | -5.84    | < 0.01   |
|                | Cover type [PSME] | 0.02    | 0.05 | 0.46     | < 0.01   |
| 10-hr woody    | (Intercept)       | 0.95    | 0.09 | 10.80    | < 0.01   |
|                | Cover type [PIPO] | -0.45   | 0.12 | -3.72    | < 0.01   |
|                | Cover type [PIPU] | -0.44   | 0.18 | -2.50    | < 0.01   |
|                | Cover type [POTR] | -0.41   | 0.15 | -2.76    | < 0.01   |
|                | Cover type [PSME] | -0.22   | 0.16 | -1.34    | < 0.01   |
| 100-hr woody   | (Intercept)       | 1.00    | 0.11 | 8.94     | < 0.01   |
|                | Cover type [PIPO] | -0.33   | 0.15 | -2.15    | < 0.01   |
|                | Cover type [PIPU] | 0.70    | 0.28 | 2.53     | < 0.01   |
|                | Cover type [POTR] | -0.13   | 0.20 | -0.65    | < 0.01   |
|                | Cover type [PSME] | -0.29   | 0.20 | -1.43    | < 0.01   |
| Litter         | (Intercept)       | 0.25    | 0.02 | 16.40    | < 0.01   |
|                | Cover type [PIPO] | 0.05    | 0.02 | 2.36     | < 0.01   |
|                | Cover type [PIPU] | 0.05    | 0.03 | 1.62     | < 0.01   |
|                | Cover type [POTR] | -0.02   | 0.03 | -0.74    | < 0.01   |
|                | Cover type [PSME] | 0.15    | 0.03 | 5.24     | < 0.01   |
| Duff           | (Intercept)       | 3.11    | 0.13 | 24.30    | < 0.01   |
|                | Cover type [PIPO] | -2.13   | 0.18 | -12.10   | < 0.01   |
|                | Cover type [PIPU] | -0.36   | 0.30 | -1.20    | < 0.01   |
|                | Cover type [POTR] | -1.97   | 0.22 | -8.98    | < 0.01   |
|                | Cover type [PSME] | -1.10   | 0.23 | -4.71    | < 0.01   |
| Total          | (Intercept)       | 5.81    | 0.21 | 27.30    | < 0.01   |
|                | Cover type [PIPO] | -3.26   | 0.29 | -11.10   | < 0.01   |
|                | Cover type [PIPU] | -0.75   | 0.61 | -1.23    | < 0.01   |
|                | Cover type [POTR] | -2.61   | 0.40 | -6.56    | < 0.01   |

|                   |                         |        |        |       |        |
|-------------------|-------------------------|--------|--------|-------|--------|
|                   | Cover type [PSME]       | -1.68  | 0.42   | -4.01 | < 0.01 |
| Linear regression |                         |        |        |       |        |
| 1-hr woody        | (Intercept)             | 0.27   | 0.07   | 4.03  | < 0.01 |
|                   | Basal area              | 0.03   | 0.01   | 4.49  | < 0.01 |
|                   | Cover type [PIPO]       | -0.15  | 0.04   | -4.06 | < 0.01 |
|                   | Cover type [PIPU]       | 0.10   | 0.06   | 1.58  | 0.12   |
|                   | Cover type [POTR]       | -0.15  | 0.05   | -3.28 | < 0.01 |
|                   | Cover type [PSME]       | 0.03   | 0.05   | 0.64  | 0.53   |
|                   | Distance to tree        | -0.04  | 0.02   | -2.26 | 0.02   |
|                   | Distance to large tree  | 0.02   | 0.02   | 1.44  | 0.15   |
|                   | Slope                   | -0.01  | < 0.01 | -2.17 | 0.03   |
| 10-hr woody       | (Intercept)             | -0.15  | 0.60   | -0.26 | 0.80   |
|                   | Cover type [PIPO]       | -0.08  | 0.19   | -0.41 | 0.68   |
|                   | Cover type [PIPU]       | -0.27  | 0.27   | -1.01 | 0.31   |
|                   | Cover type [POTR]       | -0.38  | 0.22   | -1.75 | 0.08   |
|                   | Cover type [PSME]       | < 0.01 | 0.19   | -0.01 | 0.99   |
|                   | TPH                     | 3.23   | 1.83   | 1.76  | 0.08   |
|                   | Distance to tree        | -0.04  | 0.03   | -1.21 | 0.23   |
|                   | Aspect                  | -0.16  | 0.10   | -1.66 | 0.10   |
|                   | Flow direction          | -0.36  | 0.10   | -3.44 | < 0.01 |
|                   | Topographic wetness     | 0.17   | 0.08   | 2.14  | 0.03   |
| 100-hr woody      | (Intercept)             | 1.83   | 0.41   | 4.49  | < 0.01 |
|                   | Cover type [PIPO]       | -0.50  | 0.20   | -2.57 | 0.01   |
|                   | Cover type [PIPU]       | -0.32  | 0.24   | -1.34 | 0.18   |
|                   | Cover type [POTR]       | 0.01   | 0.22   | 0.05  | 0.96   |
|                   | Cover type [PSME]       | -0.19  | 0.21   | -0.87 | 0.39   |
|                   | Flow direction          | -0.28  | 0.11   | -2.53 | 0.01   |
|                   | Topographic wetness     | -0.12  | 0.08   | -1.48 | 0.14   |
|                   | Curvature               | 1.11   | 0.30   | 3.67  | < 0.01 |
| Litter            | (Intercept)             | -0.05  | 0.12   | -0.39 | 0.70   |
|                   | Basal area              | 0.01   | < 0.01 | 2.91  | < 0.01 |
|                   | Cover type [PIPO]       | 0.09   | 0.03   | 3.08  | < 0.01 |
|                   | Cover type [PIPU]       | 0.08   | 0.03   | 2.38  | 0.02   |
|                   | Cover type [POTR]       | 0.05   | 0.03   | 1.62  | 0.11   |
|                   | Cover type [PSME]       | 0.15   | 0.03   | 4.89  | < 0.01 |
|                   | Large trees per hectare | -0.87  | 0.53   | -1.65 | 0.10   |
|                   | Slope                   | 0.01   | < 0.01 | 3.00  | < 0.01 |
|                   | Aspect                  | -0.04  | 0.02   | -2.46 | 0.01   |
|                   | Topographic wetness     | 0.03   | 0.02   | 1.93  | 0.05   |
|                   | Surface relief ratio    | 0.12   | 0.07   | 1.58  | 0.11   |
| Duff              | (Intercept)             | 0.40   | 0.75   | 0.53  | 0.60   |
|                   | Basal area              | 0.28   | 0.06   | 4.93  | < 0.01 |
|                   | Cover type [PIPO]       | -0.89  | 0.29   | -3.07 | < 0.01 |
|                   | Cover type [PIPU]       | -0.05  | 0.49   | -0.11 | 0.91   |
|                   | Cover type [POTR]       | -0.04  | 0.34   | -0.13 | 0.90   |
|                   | Cover type [PSME]       | -0.66  | 0.31   | -2.11 | 0.04   |
|                   | TPH                     | 12.42  | 3.76   | 3.30  | < 0.01 |
|                   | Large trees per hectare | -34.5  | 9.45   | -3.65 | < 0.01 |
|                   | Distance to large tree  | -0.16  | 0.04   | -3.63 | < 0.01 |

|       |                      |       |      |       |        |
|-------|----------------------|-------|------|-------|--------|
|       | Slope                | 0.05  | 0.02 | 2.33  | 0.02   |
|       | Aspect               | -0.29 | 0.14 | -2.05 | 0.04   |
|       | Curvature            | -0.13 | 0.07 | -1.90 | 0.06   |
|       | Surface relief ratio | 1.70  | 0.89 | 1.91  | 0.06   |
| Total | (Intercept)          | 5.61  | 0.61 | 9.27  | < 0.01 |
|       | Basal area           | 0.16  | 0.06 | 2.72  | 0.01   |
|       | Cover type [PIPO]    | -2.71 | 0.40 | -6.77 | < 0.01 |
|       | Cover type [PIPU]    | -0.63 | 0.64 | -0.99 | 0.32   |
|       | Cover type [POTR]    | -1.95 | 0.51 | -3.83 | < 0.01 |
|       | Cover type [PSME]    | -1.47 | 0.41 | -3.63 | < 0.01 |
|       | Distance to tree     | -0.24 | 0.08 | -3.11 | < 0.01 |
|       | Aspect               | -0.34 | 0.25 | -1.36 | 0.17   |
|       | Flow direction       | -0.59 | 0.26 | -2.32 | 0.02   |
